# Supplementary material for: Fast Mass-Production of Medical Safety Shields under COVID-19 Quarantine: Optimizing the Use of University Fabrication Facilities and Volunteer Labor
Source: PubMed Central journal article supplement (PMC7277794; doi:10.3390/ijerph17103418), 2020-05-14
Supplement: ijerph-17-03418-s001.pdf [file ijerph-17-03418-s001.pdf]

**Supplementary Materials:**

S1. Examples of medical face shields available at the markets of USA and UK. Industrial products.

| N | Appearance                                                                                                                                                                                                                                   | Producer                  | Price per 1 pcs | Material/Weight, g                                                       |
|---|----------------------------------------------------------------------------------------------------------------------------------------------------------------------------------------------------------------------------------------------|---------------------------|-----------------|--------------------------------------------------------------------------|
| 1 |                                                                                                                                                             | Dexter,<br>Minnesota, USA | 15 USD          | Undisclosed (Elastic Band and Comfort Sponge)/368.5                      |
| 2 |                                                                                                                                                             | China                     | 1.26 USD        | High-quality optical and distortion-free 7mm polyester film/ Undisclosed |
| 3 |                                                                                                                                                            | China                     | 2.60 USD        | PET visor + PC frame/80 ... 141 g                                        |
| 4 |                                                                                                                                                           | Plastifab Inc.<br>AZ, USA | 26.50<br>USD    | Polycarbonate + PETG/173 g                                               |
| 5 | <p data-bbox="347 1480 616 1552">Full face protection<br/>Manufactured in the U.K<br/>Free delivery</p>  <p data-bbox="357 1809 587 1854">Face Shield</p> | UK                        | 7,50 GBP        | PPE/Undisclosed                                                          |

S2. Technical Data Sheet and Assembling Instructions.

## Full face protection shield



**1** Flap\*  
**2** forehead strip\*  
**3** elastic band

\*PET sheet

**Variants:**

A) Full size ("L") or shortened ("S") in low weight (0.3 mm) or standard (0.5 mm) variants

B) combined with protection mantle

C) with anti-slip forehead stripe to wear over Tyvek suit



**To sterilize/disinfect:**

- remove elastic band (to be incinerated)
- apply antiseptic liquid or UV
- assemble with new elastic band

✓ Supplier: Skoltech, Moscow  
 ✓ 2000...8000 sets/day\*  
 ✓ Only local materials  
 ✓ Reusable sterilizable  
 ✓ Changeable elastic bands in the kit  
 ✓ Low cost  
 ✓ Extra light

\* Limited free supply is available by request from hospitals

[fablab@skoltech.ru](mailto:fablab@skoltech.ru) +79778075032

(a) Technical Data Sheet.

## How to assemble? (2-3 min)

Apply forehead stripe to flap and insert elastic band into the side slot

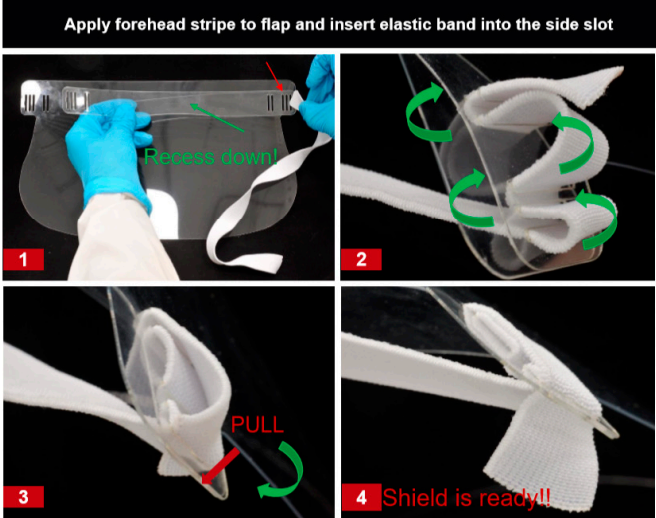

**1** Recess down!

**2**

**3** PULL

**4** Shield is ready!!

Size and mass:

L size Light — 40 g  
 L size Standard — 53g



S size Light — 35 g  
 S size Standard — 39 g

[fablab@skoltech.ru](mailto:fablab@skoltech.ru) +79778075032

(b) Assembling Instructions

**S3. Institutions that performed tests of Face Medical Shields**

1. MEDSI group clinics. Moscow City, <https://medsi.ru/services/statsionar/>
2. Federal State Autonomous Educational Institution of Higher Education I. M. Sechenov First Moscow State Medical University of the Ministry of Health of the Russian Federation (Sechenov University)  
[https://www.sechenov.ru/univers/about\\_lecturer/56202/](https://www.sechenov.ru/univers/about_lecturer/56202/)
